# Supplementary material for: Peripherally derived FGF21 promotes remyelination in the central nervous system
Source: JCI journal article supplement (doi:10.1172/jci94337), 2017-08-20
Supplement: sd1 [file 1]

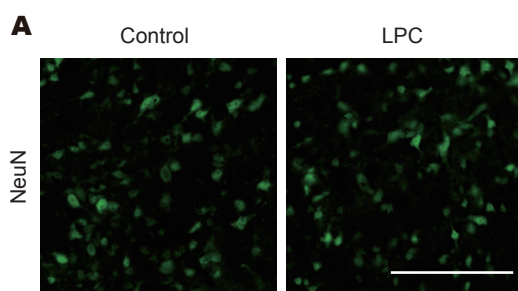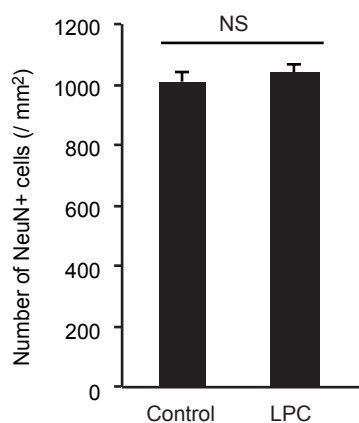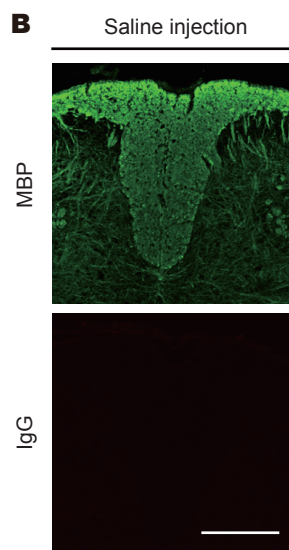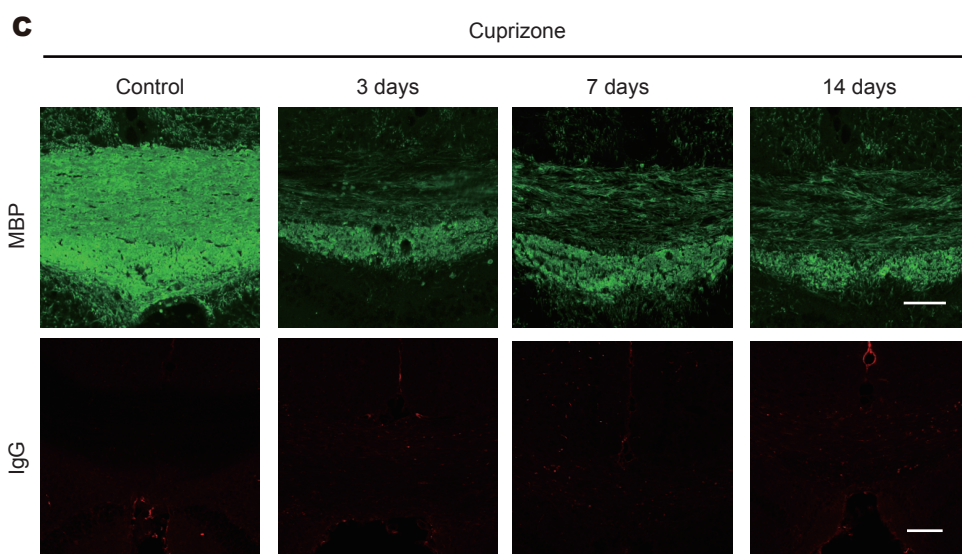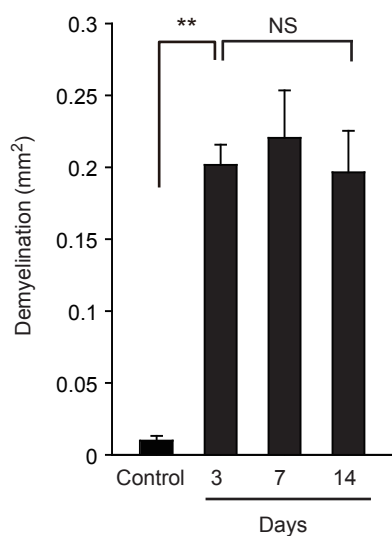

**Supplemental Figure 1 Time course of vascular barrier disruption and remyelination.**

(A) Representative image of spinal cord sections labeled with NeuN. Sections were prepared 3 days after LPC injection. Graph show NeuN<sup>+</sup> cell density in the spinal cord section (n= 4 for Control, n= 6 for LPC);  $P = 0.70913$ . (B) Representative images of spinal cord sections visualized with MBP (upper panel) and endogenous IgG (lower panel). Sections were prepared 3 days after saline injection. (C) Representative images of brain sections visualized with MBP (upper panel) and endogenous IgG (lower panel) the indicated number of days after removal of the cuprizone diet. Graphs show the time course of demyelination the indicated number of days after removal of the cuprizone diet (n = 3 each);  $P = 0.0017$  as determined by Student's *t*-test or ANOVA with Tukey's test. Error bars represent s.e.m. NS indicates no significant difference. Scale bars: 100  $\mu\text{m}$  for A and B, 50  $\mu\text{m}$  for C.

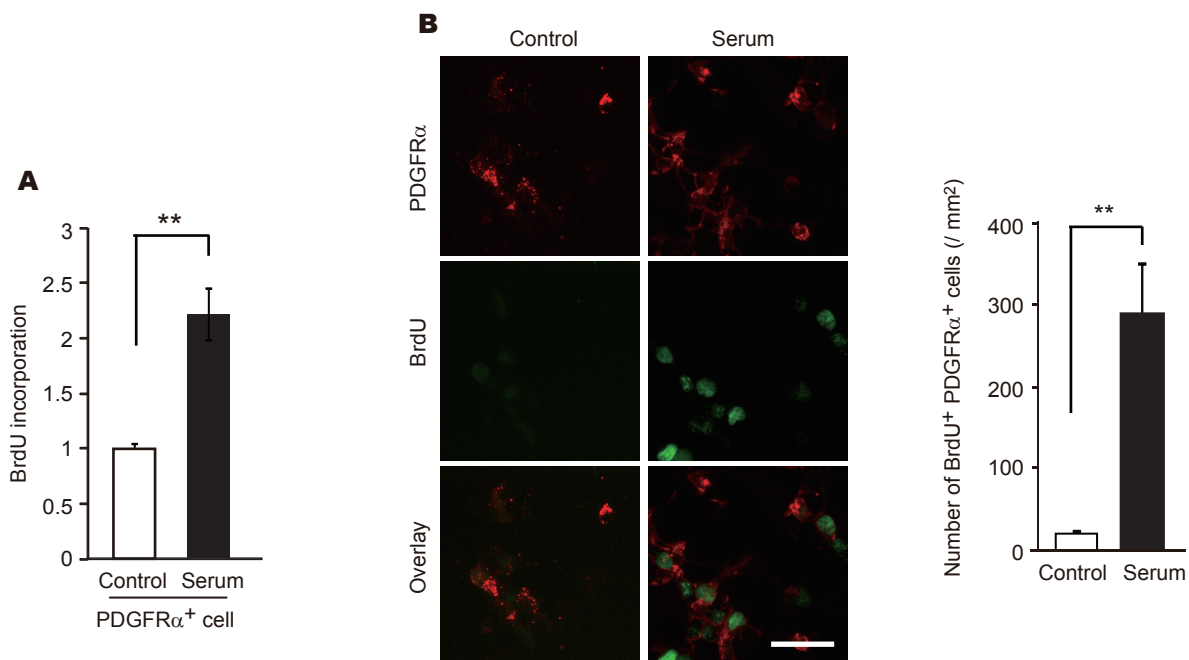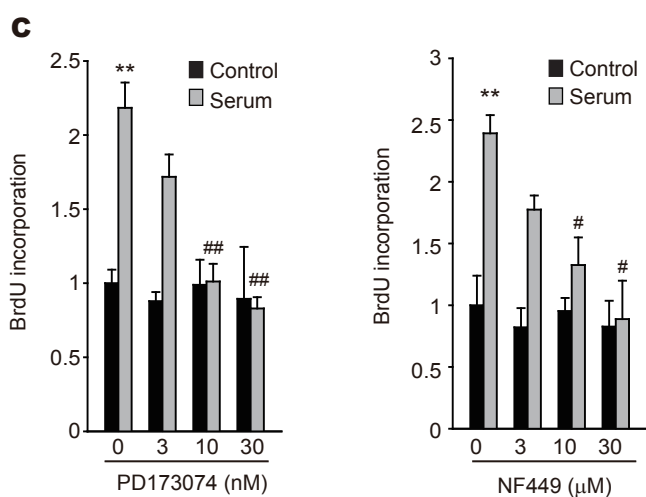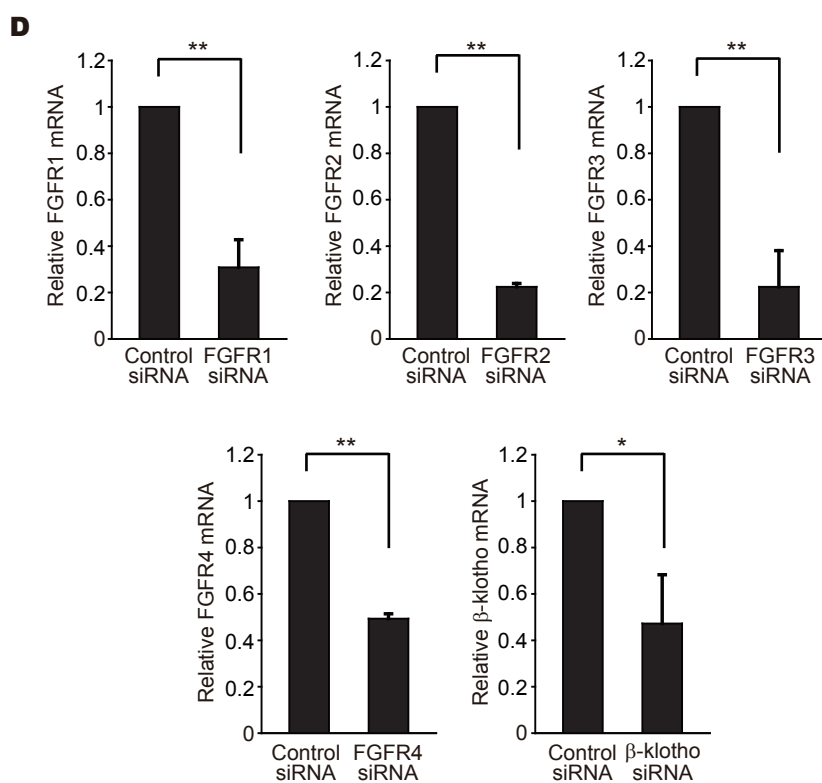

**Supplemental Figure 2 FGF21 signaling is involved in circulating factor–mediated OPC proliferation.**

(A) Concentration-dependence of BrdU incorporation in PDGFR $\alpha$ <sup>+</sup> OPCs cultured with adult mouse serum ( $n = 6$ );  $P < 0.0001$ . (B) Representative images of OPC culture isolated using A2B5-positive microbeads. Cells were cultured with adult mouse serum, and then double-labeled for PDGFR $\alpha$  and BrdU. No cells that were double-labeled for GFAP and BrdU were detected in the culture. Graphs show quantitation as indicated in each images. ( $n = 9$ );  $P < 0.0001$ . (C) BrdU incorporation in OPCs after serum stimulation with PD173074 (left,  $n = 4$ ) and NF449 (right,  $n = 4$ );  $P < 0.0001$  (left graph),  $P = 0.0009$ ,  $0.0231$ ,  $0.0013$  (right graph, left to right). #, ## compared with serum treatment. (D) Relative expression of FGFRs mRNA in OPCs after transfection with siRNAs against the indicated FGFRs. A2B5<sup>+</sup> cells were isolated 48 h after transfection ( $n = 3$  for FGFR1,  $n = 4$  for FGFR2,  $n = 5$  for FGFR3,  $n = 3$  for FGFR4,  $n = 4$  for  $\beta$ -klotho);  $P = 0.0022$ ,  $0.0001$ ,  $0.001$ ,  $0.0001$ ,  $0.023$  (left to right) as determined by Student's t-test, ANOVA with Tukey's post-hoc test. Error bars represent s.e.m. NS indicates not significant. Scale bars: 50  $\mu$ m.

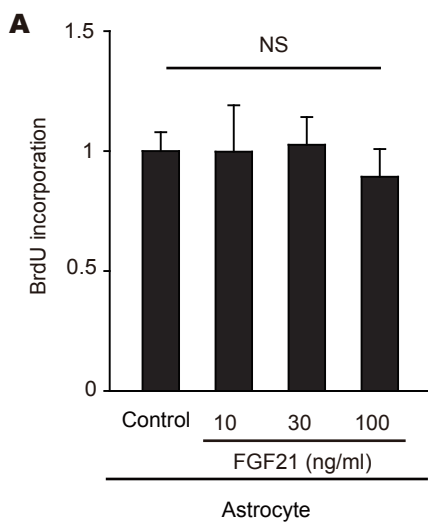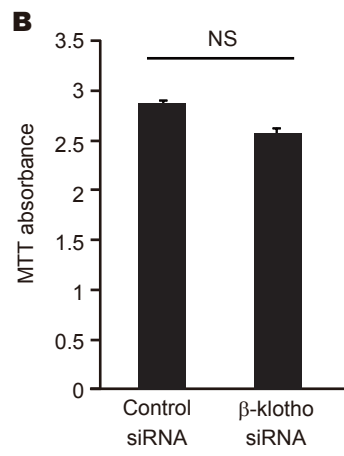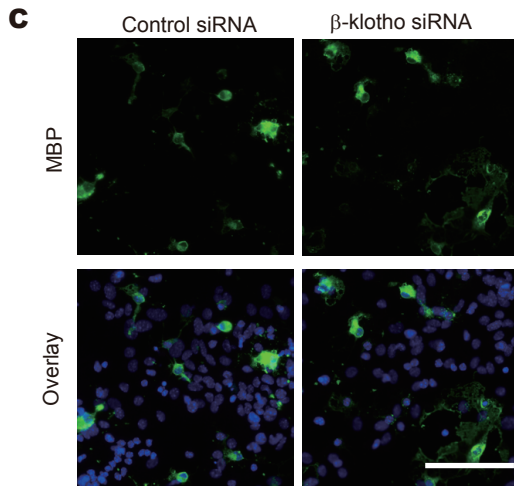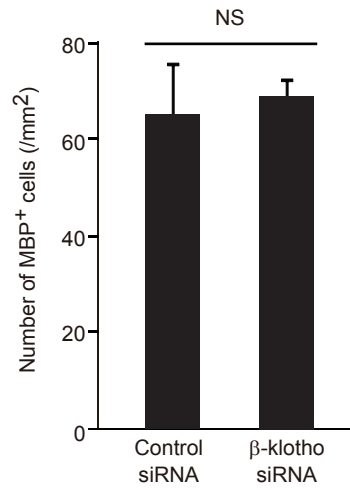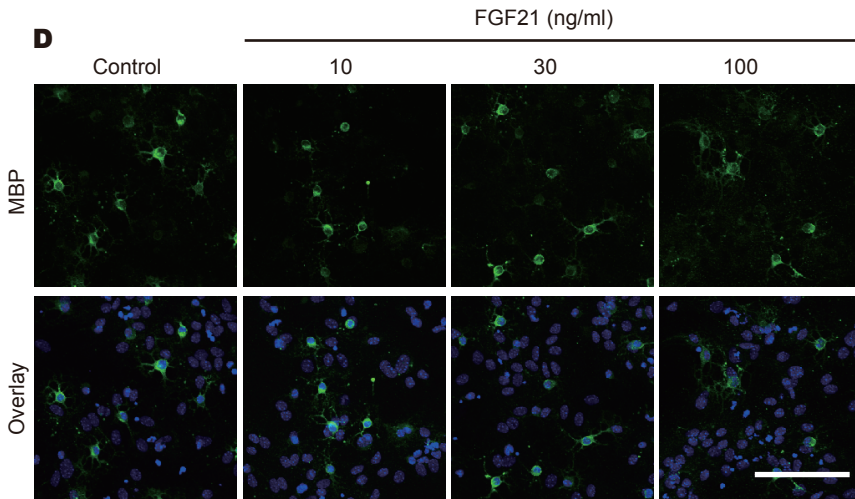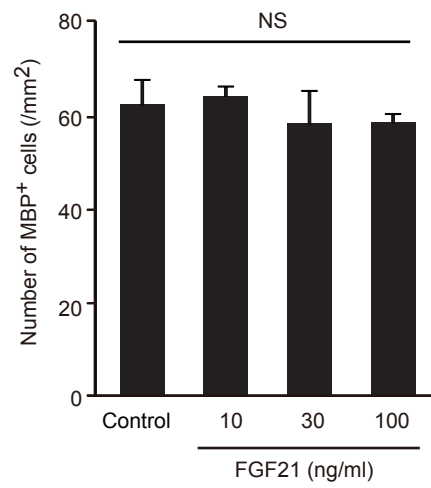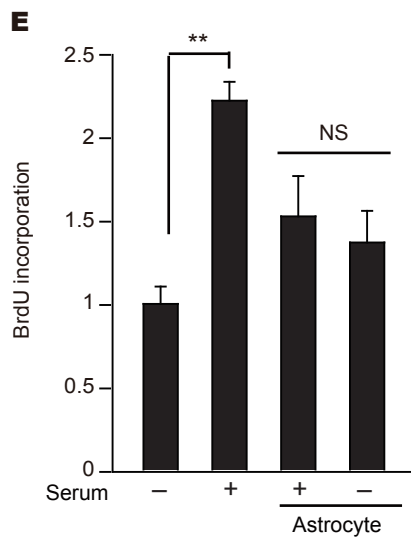

**Supplemental Figure 3 Astrocyte is not involved in FGF21-mediated OPC proliferation.**

(A) BrdU incorporation in astrocyte 3 days after stimulation with the indicated concentrations of FGF21 ( $n = 4$ ),  $P = 0.8956$ . (B) Change in MTT reduction in OPCs 48 h after  $\beta$ -klotho siRNA transfection ( $n = 6$ );  $P = 0.7936$ . (C) Representative images of cultures labeled for MBP and DAPI. OPCs were transfected with  $\beta$ -klotho siRNA. Graphs show quantitation as indicated in each image ( $n = 4$ );  $P = 0.4044$ . (D) Representative images of culture labeled for MBP and DAPI. OPCs were treated with recombinant FGF21. Graphs show quantitation as indicated in each images ( $n = 3$ );  $P = 0.9321, 0.6148, 0.6744$  (left to right). (E) BrdU incorporation in A2B5<sup>+</sup> OPCs 3 days after stimulation with astrocyte supernatant. Astrocytes were cultured for 1 day with or without stimulation with adult mouse serum. After culture, the astrocyte supernatant was collected and added into the A2B5<sup>+</sup> cell culture ( $n = 6$ );  $P = 0.0002$  as determined by Student's *t*-test, ANOVA with Tukey's post-hoc test. Error bars represent s.e.m. NS indicates not significant. Scale bars: 50  $\mu$ m.

**A**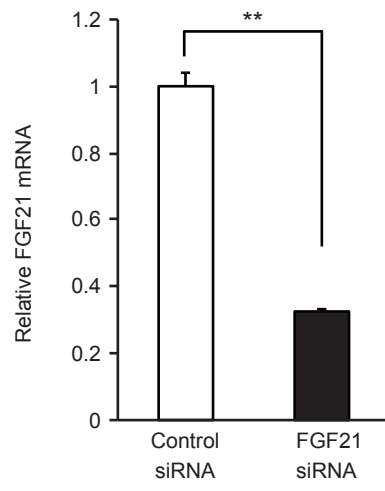**B**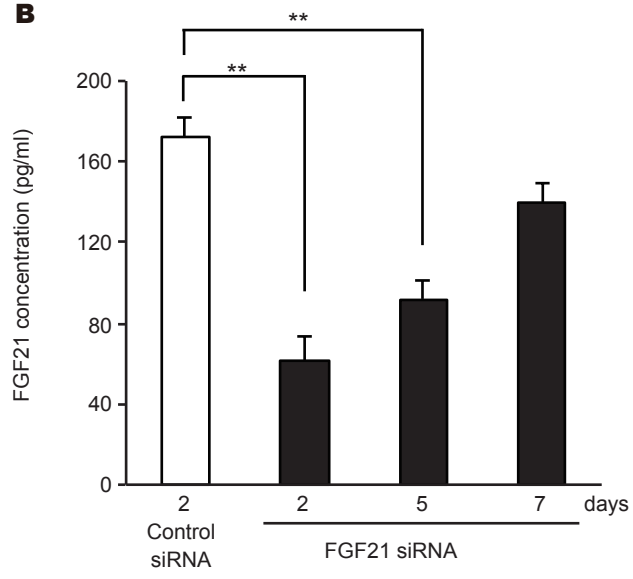

**Supplemental Figure 4 FGF21 in the CNS from the circulation.**

(A) Relative expression of FGF21 mRNA in pancreas 2 days after siRNA transfection (n = 3);  $P = 0.0001$ . (B) FGF21 content in serum of mice that received FGF21 siRNA transfection (n = 3 for control siRNA, 5 for other groups). Serum was prepared the indicated number of days after siRNA injection;  $P = 0.0004, 0.0047$  (left to right) as determined by Student's *t*-test or ANOVA with Dunnett's test. Error bars represent s.e.m.



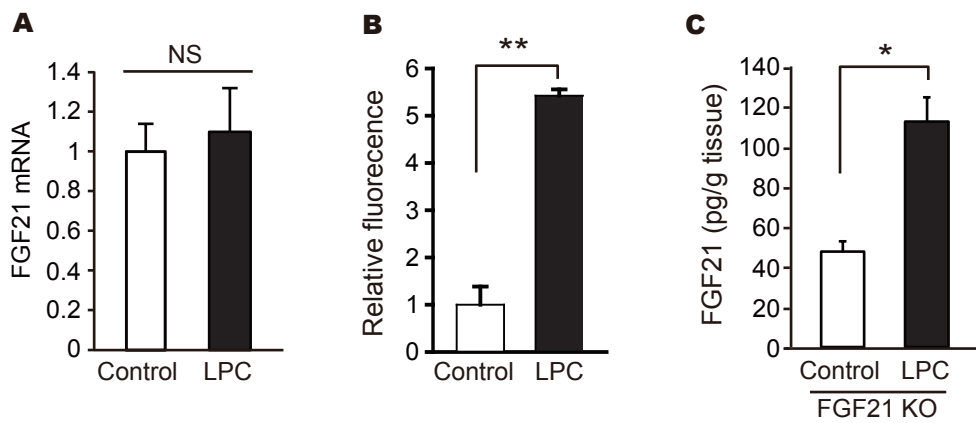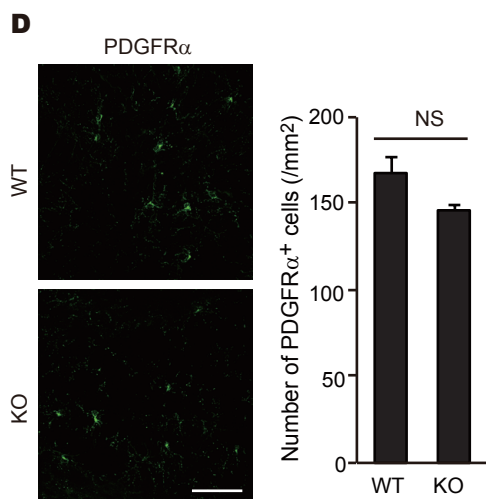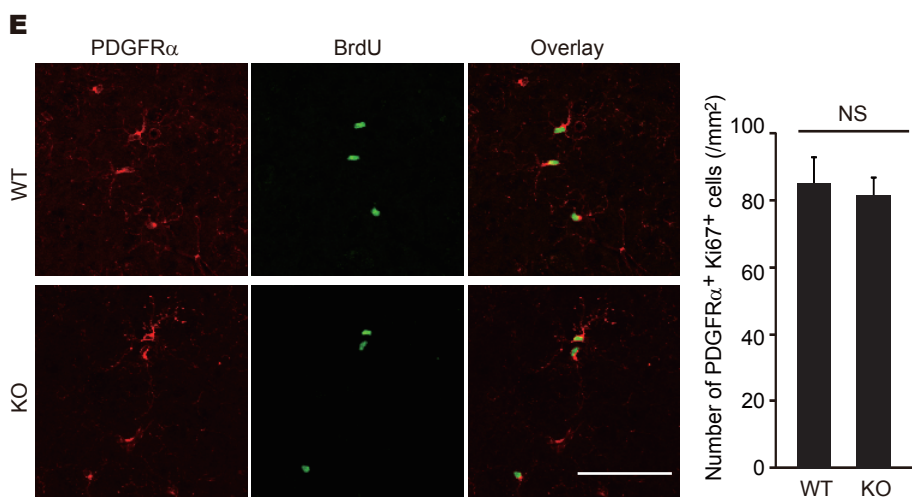

**Supplemental Figure 5 Peripheral Fgf21 promotes OPC proliferation and remyelination.**

(A) Quantitations of *Fgf21* mRNA in the spinal cord 3 days after LPC injection ( $n = 4$ );  $P = 0.0353$ . NS indicates not significant. (B) Relative intensity of fluorescence in the spinal cord 3 days after LPC injection. WT mice intravenously received recombinant FGF21 which is labeled with HiLyte Fluor 555 ( $n = 3$ );  $P = 0.004$ . (C) Measurement of FGF21 in spinal cord (pg/g) of *Fgf21*-knockout mice ( $n = 3$ ) infused subcutaneously with FGF21 for 7 days;  $P = 0.0191$ . (D) Representative images of spinal cord sections labeled for PDGFR $\alpha$ . Spinal cord sections were obtained from *Fgf21*-knockout mice and control littermates. Graphs show quantitations as indicated in the images ( $n = 4$ );  $P = 0.1091$ . NS indicates not significant. (E) Representative images of spinal cord sections double-labeled for PDGFR $\alpha$  and BrdU. Spinal cord sections were obtained from *Fgf21*-knockout mice and control littermates. Graphs show quantitations as indicated in the images ( $n = 3$ );  $P = 0.7953$ . (F) Representative images of spinal cord sections labeled for MBP. Spinal cord sections were obtained from *Fgf21*-knockout mice and control littermates. Graphs show quantitations as indicated in the images ( $n = 4$ );  $P = 0.5106$  as determined by Student's *t*-test. Error bars represent s.e.m. NS indicates not significant. Scale bars: 50  $\mu\text{m}$  for D and E, 200  $\mu\text{m}$  for F.

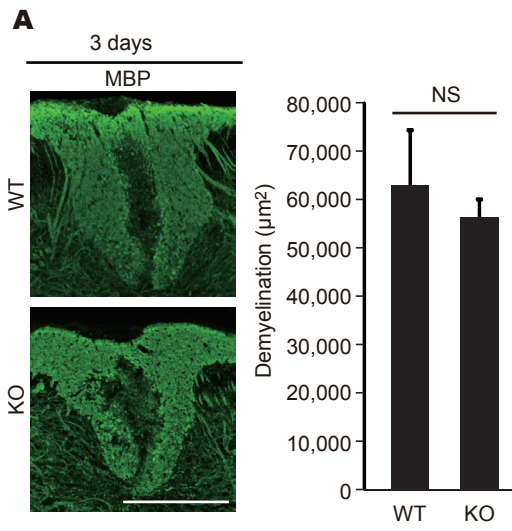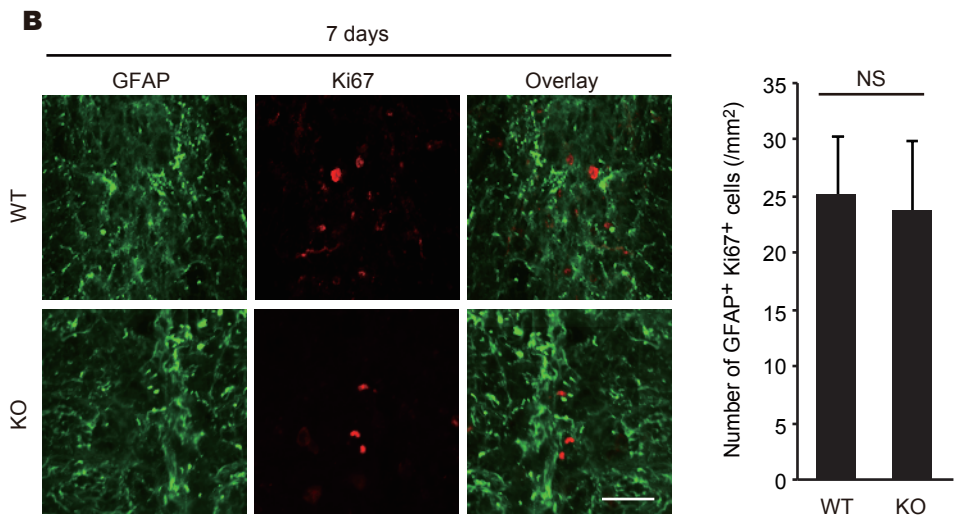

**Supplemental Figure 6 Peripheral Fgf21 does not associate with demyelination.**

**(A)** Representative images of spinal cord sections labeled for MBP 3 days after LPC injection. Spinal cord sections were obtained from *Fgf21*-knockout mice and control littermates. Graphs show quantitations as indicated in the images ( $n = 3$ );  $P = 0.45144$ .

**(B)** Representative images of spinal cord sections labeled for GFAP 7 days after LPC injection. Spinal cord sections were obtained from *Fgf21*-knockout mice and control littermates. Graphs show quantitations as indicated in the images ( $n = 3$ );  $P = 0.8851$  as determined by Student's *t*-test. Error bars represent s.e.m. NS indicates not significant.

Scale bars: 200  $\mu\text{m}$  for **A**, 50  $\mu\text{m}$  for **B**.

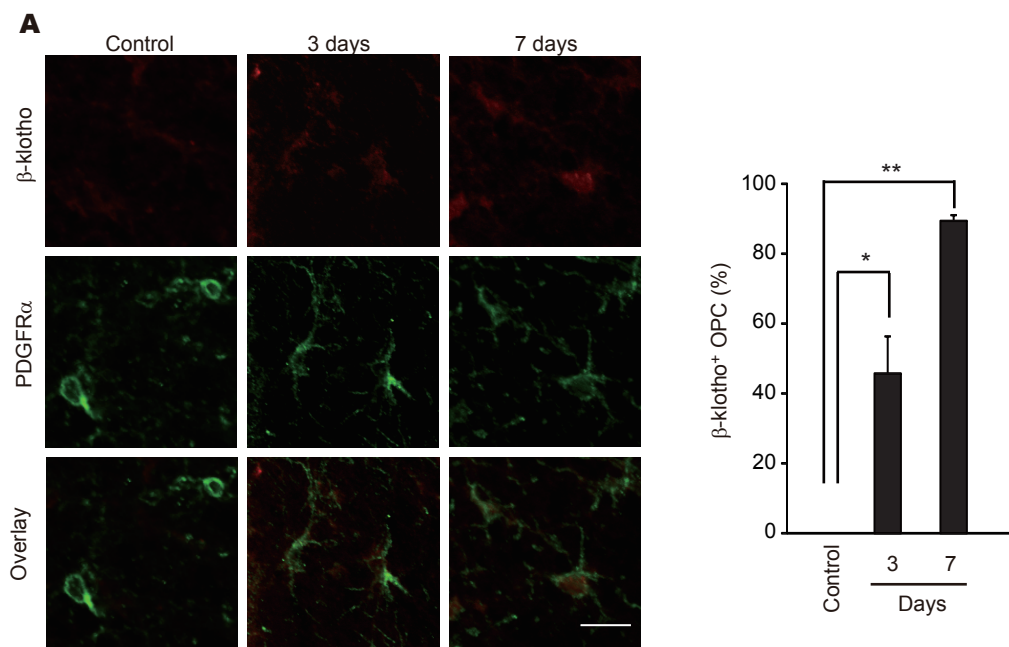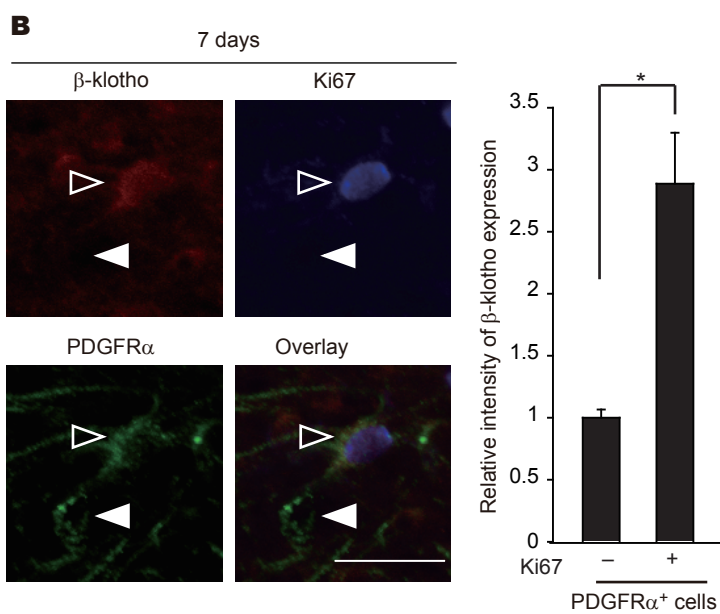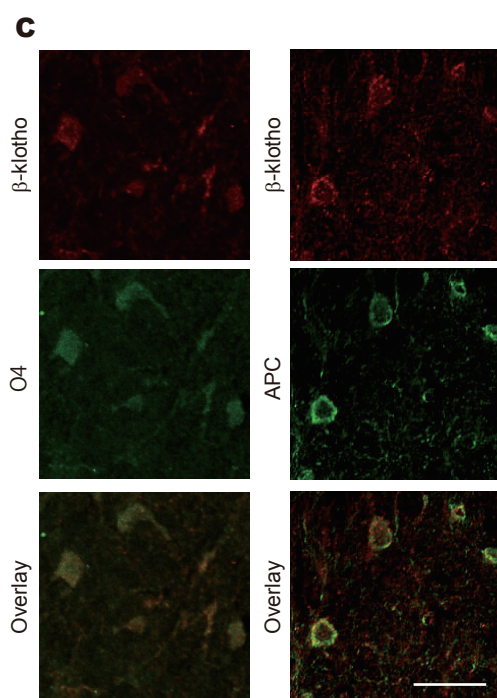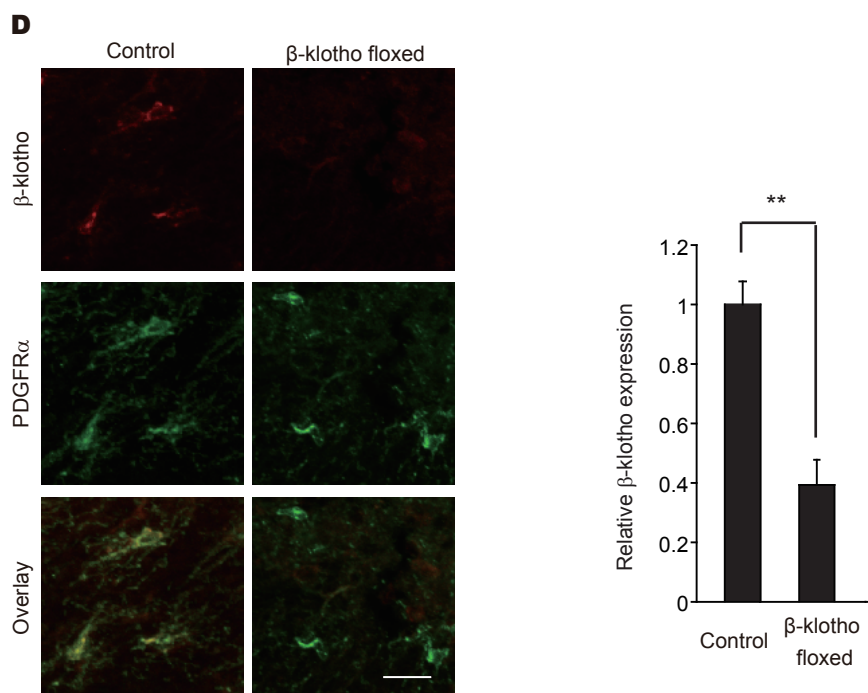

**Supplemental Figure 7  $\beta$ -klotho expression is involved in OPC proliferation after demyelination.**

(A) Representative images of spinal cord sections double-labeled for PDGFR $\alpha$  and  $\beta$ -klotho. Graphs show quantitation as indicated in the images ( $n = 3$ );  $P = 0.0145$ ,  $0.0005$  (left to right). (B) Representative images of spinal cord sections triple-labeled for PDGFR $\alpha$ , Ki67, and  $\beta$ -klotho. Spinal cord sections were obtained 7 days after LPC injection. Graphs show quantitation as indicated in the images ( $n = 3$ );  $P = 0.011$ . Open arrowhead indicates a Ki67-positive cell labeled with PDGFR $\alpha$ . White arrowhead indicates a Ki67-negative cell labeled with PDGFR $\alpha$ . (C) Representative image of spinal cord sections double-labeled for O4 (left) or APC (right) with  $\beta$ -klotho. Spinal cords were obtained 3 days after LPC injection. (D) Relative intensity of  $\beta$ -klotho protein expression in PDGFR $\alpha$ -positive OPCs obtained from spinal cords of  $\beta$ -klotho-conditional knockout mice 7 days after LPC injection ( $n = 3$  each);  $P = 0.0062$  as determined by Student's  $t$ -test or ANOVA with Dunnett's test. Error bars represent s.e.m. NS indicates not significant. Scale bars: 20  $\mu\text{m}$  for A, B and D, 50  $\mu\text{m}$  for C.

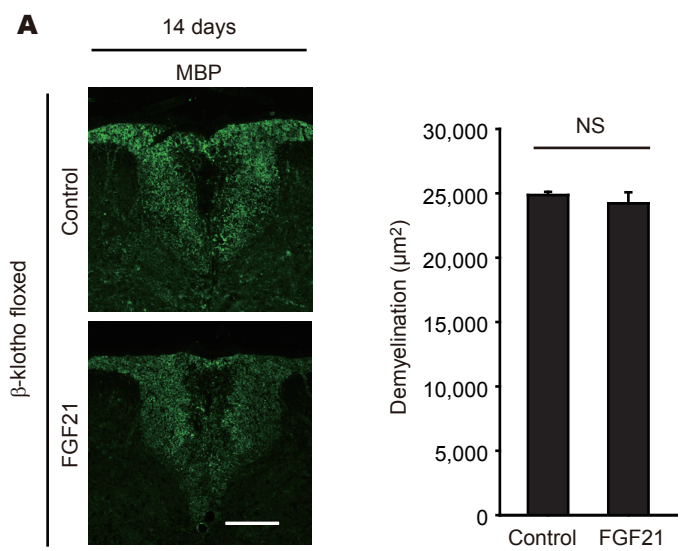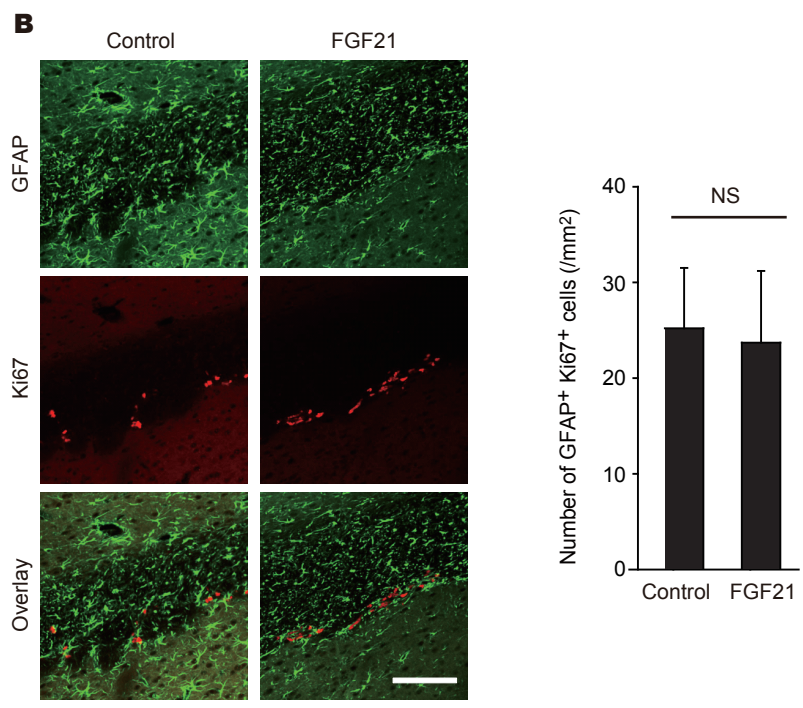

**Supplemental Figure 8  $\beta$ -klotho expression in OPC is essential for remyelination by peripheral hormone.**

(A) Representative images of spinal cord sections labeled for MBP. Spinal cord sections were obtained from  $\beta$ -klotho-conditional knockout mice with or without FGF21 treatment. Graphs show quantitations as indicated in the images ( $n = 4$ );  $P = 0.4997$ . (B) Representative images of brain sections double-labeled for GFAP and Ki67. Brain sections were obtained 7 days after injury. Graphs show quantitations as indicated in the images ( $n = 3$ );  $P = 0.8851$  as determined by Student's  $t$ -test. Error bars represent s.e.m. NS indicates not significant. Scale bars: 20  $\mu$ m for 200  $\mu$ m for A, 100  $\mu$ m for B.



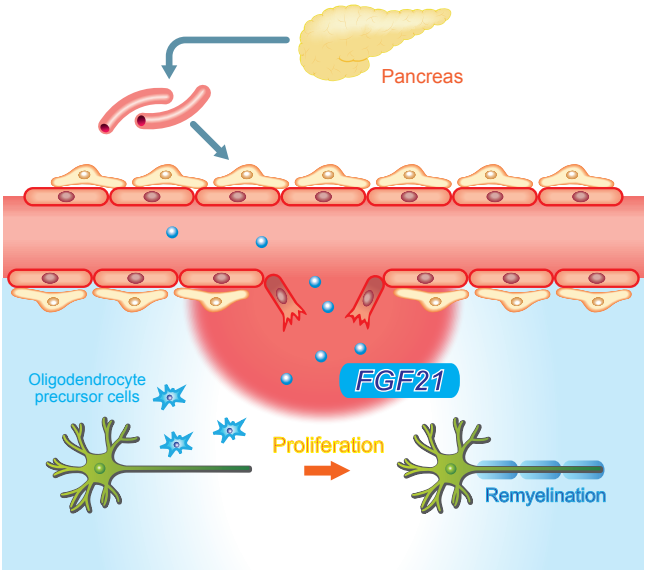

**Supplemental Figure 9 Diagrammatic illustration of this study.**

CNS is isolated from peripheral milieu by the vascular barrier. Therefore, CNS regeneration has been thought to be controlled by the CNS microenvironment *in situ*. However, CNS injury disrupts the vascular barrier, leading to leakage of circulating factors into the CNS. One of these factors, FGF21 expressed in pancreas, promotes OPC proliferation and subsequent remyelination. We propose that peripheral milieu regulates CNS regeneration.

| Inhibitor                              | Inhibition rate (%) | Inhibitor                            | Inhibition rate (%) |
|----------------------------------------|---------------------|--------------------------------------|---------------------|
| ATM Kinase                             | 118.33              | JNK Inhibitor II                     | 49.98               |
| ATM/ ATR Kinase Inhibitor              | -51.37              | JAK3 Inhibitor IV                    | -20.49              |
| AG 1024                                | 94.95               | JNK Inhibitor, Negative Control      | -10.53              |
| AG L 2043                              | 135.01              | IGF-1R Inhibitor II                  | -40.63              |
| Akt Inhibitor IV                       | -27.87              | JNK Inhibitor V                      | -22.59              |
| Akt Inhibitor V, T riciribine          | 127.38              | JNK Inhibitor VIII                   | 90.00               |
| Akt Inhibitor VIII, Isozyme-Selective, | -27.53              | K-252a, Nocardiosis sp.              | -21.99              |
| Akt Inhibitor X                        | -52.15              | KN-93                                | -21.09              |
| Aminopurvalanol A                      | 131.09              | Lck Inhibitor                        | -21.96              |
| AMPK Inhibitor, Compound C             | 134.93              | LY 294002                            | 8.32                |
| Aurora Kinase Inhibitor II             | 117.20              | LY 303511- Negative control          | 117.54              |
| Aurora Kinase Inhibitor III            | 116.92              | MEK Inhibitor I                      | -12.97              |
| Aurora Kinase/Cdk Inhibitor            | 112.71              | MEK Inhibitor II                     | 121.32              |
| BAY11-7082                             | 134.01              | MEK1/2 Inhibitor                     | 37.69               |
| Bcr-abl Inhibitor                      | 2.25                | MNK1 Inhibitor                       | 29.47               |
| Bisindolylmaleimide I                  | 135.82              | MK2a Inhibitor                       | -0.45               |
| Bisindolylmaleimide IV                 | 119.54              | NF449                                | 26.31               |
| Bohemine                               | 148.06              | NF-kB Activation Inhibitor           | -6.45               |
| BPIQ-I                                 | 117.06              | p38 MAP Kinase Inhibitor III         | -13.76              |
| Cdk1 Inhibitor                         | 133.30              | p38 MAP Kinase Inhibitor             | 29.46               |
| Cdk1 Inhibitor, CGP74514A              | 82.28               | PD 98059                             | 52.55               |
| Cdk1/2 Inhibitor III                   | 79.87               | PD 169316                            | 12.03               |
| Cdk1/5 Inhibitor                       | 93.16               | PD 158780                            | 8.99                |
| Casein Kinase I Inhibitor, D4476       | 109.62              | PD 173074                            | 19.49               |
| Casein Kinase II Inhibitor III, TBCA   | 101.96              | PD 174265                            | -16.49              |
| Cdk4 Inhibitor II, NSC 625987          | 102.37              | PDGF Receptor Tyrosine Kinase        | -73.53              |
| Cdk4 Inhibitor III                     | -21.85              | PDGF Receptor Tyrosine Kinase        | -24.1               |
| Cdc2-Like Kinase Inhibitor, TG003      | 100.06              | PDGF RTK Inhibitor                   | -67.15              |
| Cdk/Crk Inhibitor                      | 95.33               | PDK1/Akt/Flt Dual Pathway Inhibitor  | -31.40              |
| Chelerythrine Chloride                 | -38.82              | PKR Inhibitor                        | -85.61              |
| Chk2 Inhibitor II                      | 73.83               | PKR Inhibitor, Negative Control      | -28.16              |
| Compound 52                            | 127.38              | PI-103                               | -68.06              |
| Compound 56                            | 105.07              | PI 3-Kg Inhibitor                    | 53.20               |
| Cdk2 Inhibitor III                     | 133.70              | PI 3-Kg Inhibitor II                 | 19.57               |
| Cdk2 Inhibitor IV, NU6140              | -18.97              | SB 218078                            | -34.31              |
| DNA-PK Inhibitor II                    | 95.87               | SC-68376                             | 131.22              |
| DNA-PK Inhibitor III                   | 87.55               | SKF-86002                            | 56.82               |
| DNA-PK Inhibitor V                     | 88.99               | Sphingosine Kinase Inhibitor         | -32.77              |
| Diacylglycerol Kinase Inhibitor II     | -36.30              | Src Kinase Inhibitor I               | -51.58              |
| DMBI                                   | 96.66               | Staurosporine, Streptomyces sp.      | -33.01              |
| EGFR Inhibitor                         | -38.06              | ST O-609                             | 133.24              |
| EGFR/ErbB-2/ErbB-4 Inhibitor           | 152.83              | SU6656                               | 84.14               |
| ERK Inhibitor II, FR180204             | 105.79              | SU9516                               | 37.45               |
| ERK Inhibitor II, Negative control     | 125.28              | SU 11652                             | -32.69              |
| ERK Inhibitor III                      | 95.03               | Syk Inhibitor                        | 110.96              |
| Fascaplysin, Synthetic                 | -32.44              | Syk Inhibitor II                     | 40.63               |
| Flt-3 Inhibitor                        | 108.46              | Syk Inhibitor III                    | 91.39               |
| Flt-3 Inhibitor II                     | 104.42              | Tpl2 Kinase Inhibitor                | 123.67              |
| Flt-3 Inhibitor III                    | 87.06               | TGF-b RI Kinase Inhibitor            | 68.65               |
| GSK-3b Inhibitor I                     | -44.49              | TGF-b RI Inhibitor III               | -28.28              |
| GSK-3b Inhibitor II                    | 103.53              | AG 9                                 | 63.04               |
| GSK-3b Inhibitor VIII                  | 150.74              | AG 490                               | -27.77              |
| GSK-3b Inhibitor XI                    | 175.07              | AG 112                               | 89.44               |
| GSK3b Inhibitor XII, TWS 119           | 156.94              | AG 1295                              | 96.15               |
| GSK-3 Inhibitor XIII                   | 191.45              | AG 1296                              | 63.69               |
| Gö 6983                                | 111.18              | AG 1478                              | 64.42               |
| GTP-14564                              | 107.52              | VEGF Receptor 2 Kinase Inhibitor I   | 59.23               |
| Isogranulatimide                       | 121.86              | VEGF Receptor Tyrosine Kinase        | 30.61               |
| H-89, Dihydrochloride                  | 105.79              | VEGFR Tyrosine Kinase Inhibitor IV   | -24.64              |
| H A 1077, Dihydrochloride              | 113.76              | VEGF Receptor 2 Kinase Inhibitor II  | 95.16               |
| Herbimycin A, Streptomyces sp.         | 56.24               | VEGF Receptor 2 Kinase Inhibitor III | 42.94               |
| IC261                                  | 126.31              | VEGF Receptor 2 Kinase Inhibitor IV  | 82.36               |
| IKK-2 Inhibitor IV                     | 124.55              | Wortmannin                           | 62.02               |
| Indirubin Derivative E804              | -40.71              | ROCK Inhibitor, Y -27632             | 134.25              |
| JAK3 Inhibitor II                      | 120.53              |                                      |                     |

**Supplemental Table 1 Pharmacological screening of BrdU incorporation into OPCs after serum treatment.**

Inhibitors, except for PD173074 (10 nM), were used at a final concentration of 10  $\mu$ M.

Inhibition ratios of BrdU incorporation was calculated by the following formula:

Inhibition ratio = (Absorbance of the sample treated with serum and indicated inhibitor – Absorbance of the sample treated indicated inhibitor) / (Absorbance of the sample treated with serum – Absorbance of the control)  $\times$  100. A lower value indicates more inhibition.
